1 **Title**

2

3 **MicroRNA function transitions from regulating developmental**  
4 **genes to transposable elements during the maturation of pollen**

5

6 **Authors**

7 Cecilia Oliver<sup>1</sup>, Maria Luz Annacondia<sup>1</sup>, Zhenxing Wang<sup>1</sup>, R Keith Slotkin<sup>2,3</sup>,  
8 Claudia Köhler<sup>1</sup> and German Martinez<sup>1</sup>

9

10 **Affiliations**

11 1. Department of Plant Biology, Swedish University of Agricultural Sciences and  
12 Linnean Center of Plant Biology, Uppsala, Sweden

13 2. Donald Danforth Plant Science Center, St. Louis, MO, United States of  
14 America

15 3. Division of Biological Sciences, University of Missouri Columbia

16

17 **Abstract**

18 microRNAs play important roles to control the development of eukaryotic  
19 organisms. Both animal and plant microRNAs are essential for the spatio-  
20 temporal regulation of development but together with this role, plant microRNAs  
21 also control transposable elements and stimulate the production of  
22 epigenetically-active small interfering RNAs. This last role is evident in the plant  
23 male gamete containing structure, the male gametophyte or pollen grain, but how  
24 the dual role of plant microRNAs is integrated during its development is  
25 unknown. Here, we provide a detailed analysis of microRNA dynamics during  
26 pollen development and their genic and transposable element targets using small  
27 RNA and mRNA cleavage (PARE) high-throughput sequencing. Furthermore we  
28 uncover the microRNAs loaded in the two main Argonaute proteins in the mature  
29 pollen grain, AGO1 and AGO5. Our results indicate that the developmental  
30 progression from microspore to mature pollen grain is characterized by a  
31 reprogramming from microRNAs focused on the control of development to  
32 microRNAs regulating transposable element control.

33

34 **Main**

35 Small non-coding RNAs control essential gene regulatory networks in eukaryotes  
36 at the transcriptional and postranscriptional level. This broad term includes  
37 different classes of small RNAs (sRNAs) that have different biogenesis  
38 pathways, roles and cellular distribution but (in general) use sequence  
39 complementarity to recognize their target RNAs and silence their transcription  
40 and/or inhibit their translation<sup>1</sup>. The improvement of sequencing technologies has  
41 enabled to uncover the role of novel classes of sRNAs but also to understand  
42 better their cellular distribution and their roles during different stages of  
43 development of an organism or a tissue. According to their origin sRNAs can be  
44 classified in microRNAs (miRNAs), small interfering RNAs (siRNAs), piwi-  
45 interacting RNAs (piRNAs) or tRNA-derived sRNAs (tRFs), among others (for a  
46 recent review see:<sup>2</sup>).

47

48 In the case of plants, the sRNome is monopolized by two classes of sRNAs:  
49 siRNAs and miRNAs<sup>3</sup>. These two types of sRNAs have different biogenesis  
50 pathways and functions. siRNAs are the result of the processing of an RNA-  
51 DEPENDENT RNA POLYMERASE (RDR)-produced double stranded RNA by  
52 Dicer-like proteins (DCL), mainly DCL4, DCL2 and DCL3. This leads to the  
53 production of double stranded sRNAs of between 21 and 24 nucleotides (nts) of  
54 which one of the strands will be selectively incorporated into an Argonaute (AGO)  
55 protein<sup>4</sup>. On the other hand, miRNAs originate from *MIRNA* genes that produce  
56 non-coding transcripts with high self-complementarity that fold into a short hairpin  
57 structure. This hairpin is cleaved by DCL1 into a double-stranded sRNA of 21-22  
58 nts in length. One of these sRNAs will then be selectively loaded into AGO1 and  
59 form the RISC complex, which uses the sRNA sequence to target mRNAs with  
60 perfect or imperfect sequence homology. In plants, this targeting normally leads  
61 to the cleavage of the mRNA, but can also induce translational repression<sup>4,5</sup>.  
62 Both miRNAs and siRNA regulate a diversity of processes including  
63 development, defense, reproduction and genome stability. However, generally,  
64 siRNAs regulate heterochromatin and development/defense via DNA methylation  
65 and secondary sRNAs respectively, while miRNAs are associated with the  
66 regulation of development through the posttranscriptional control of transcription  
67 factor mRNAs<sup>4</sup>. Nevertheless these two sRNA classes are intertwined in certain  
68 aspects of development. For example, regulation of auxin signaling by the  
69 generation of trans-acting siRNAs is coordinated by miRNAs<sup>6</sup>. In plants, miRNAs  
70 also play a role in genome protection through the initial targeting of transposable  
71 elements (TEs) and generation of secondary siRNAs from their transcripts<sup>7,8</sup>.  
72 Interestingly, one of the miRNAs targeting TEs, miR845, is involved in the  
73 generation of TE-derived siRNAs in the male gametophyte and mediate genome  
74 dosage response<sup>9</sup>. This diversity of miRNA-regulated processes highlights their  
75 elasticity as regulatory molecules.

76

77 The functional versatility of miRNAs is especially important during reproduction,  
78 where cells face the duality of carrying out a very specific developmental  
79 program. In other organisms like zebrafish<sup>10</sup>, mouse<sup>11</sup>, *C. elegans*<sup>12</sup> or *D.*  
80 *melanogaster*<sup>13</sup> miRNAs do not only have a differential accumulation pattern in  
81 sperm, but play important roles in sperm maturation, fertilization and post-  
82 fertilization events. However, little is known about how miRNA activity might  
83 shape the transcriptome during pollen development. Strong *ago1* and *dcl1*  
84 mutants have different reproductive abnormalities and reduced seed set<sup>14-16</sup>,  
85 which points to an important role of miRNAs during reproduction in plants.

86

87 Previous reports of *Arabidopsis* pollen sRNAs have focused on the analysis of  
88 the accumulation of these only in the mature pollen grain<sup>16,17</sup>. Here we analyze in  
89 depth the contribution of miRNAs to the sRNA population during the different  
90 stages of pollen grain development, their loading into AGO proteins and their  
91 target mRNAs. Overall, our work suggests that miRNAs involved in epigenetic  
92 regulation, like miR845, are enriched at later stages of pollen grain development

93 correlating with their preferential loading in AGO5. In contrast, miRNAs targeting  
94 mRNAs from genes involved in development decrease their accumulation during  
95 pollen development. This coincides with increased expression of their target  
96 genes at pollen maturity, which are mainly involved in pollen grain germination.  
97 Additionally, we identify a group of miRNA-regulated TEs in the pollen grain. In  
98 summary, this work shows that miRNAs modulate both the transcriptional and  
99 epigenetic reprogramming of the pollen grain.

## 100 101 **Results**

### 102 103 **Dynamic accumulation of miRNAs during pollen development**

104  
105 To understand the potential changes in development during the transition leading  
106 to the mature pollen grain, we focused on analyzing miRNA accumulation at four  
107 different stages of pollen development (uninuclear, binuclear, trinuclear and  
108 mature pollen grain, representative pictures shown in Figure 1a and  
109 Supplementary Figure 1). Using density centrifugation we isolated four different  
110 developmental stages of pollen as previously described<sup>18</sup>. We isolated total  
111 RNA, prepared and sequenced sRNA libraries from two biological replicates for  
112 each of these stages (Supplementary Figure 1 and Supplementary Table 1). The  
113 total miRNA accumulation profiles between the different developmental stages  
114 did not reveal striking differences between the stages (Figure 1b); we only found  
115 a slight increase in 22 nt miRNAs in trinuclear and mature pollen grain in  
116 comparison to uni- and binuclear (Figure 1b). The analysis of qualitative  
117 differences in the miRNA populations between our samples (Figure 1c) revealed  
118 that the majority of miRNA families are present in all our libraries (233 miRNAs);  
119 however, we also detected specific miRNAs in each developmental stage,  
120 including 23 miRNAs in the mature pollen grain and 13, 7, and 5 in the uni-, bi-  
121 and trinuclear stages, respectively (Supplementary Table 2). We further analyzed  
122 the quantitative changes experienced by the most highly accumulating miRNAs  
123 (Figure 1d). The comparison between the accumulation level of the top seven  
124 accumulating miRNA families (representing more than 90% of all sRNAs in uni-,  
125 bi- and tricellular pollen and 77% of the mature sRNAs) revealed that there is a  
126 striking progressive decrease in the accumulation of some miRNA families during  
127 pollen development. In particular, miRNAs involved in developmental processes,  
128 like miR156, miR161.1, miR159, miR166, and miR162 (Figure 1d) decrease at  
129 later stages of pollen development. In comparison, the relative levels of miR845  
130 increase substantially during pollen development until occupying close to 45% of  
131 the all sRNAs at pollen maturity (Figure 1d). We confirmed this decrease in the  
132 accumulation of miRNAs for miR156 and miR161.1 by Northern blot (Figure 1e).  
133 Together, our analysis shows that during pollen development there is a transition  
134 from a diverse miRNA pool to a miRNA pool monopolized by miR845.

135  
136  
137  
138

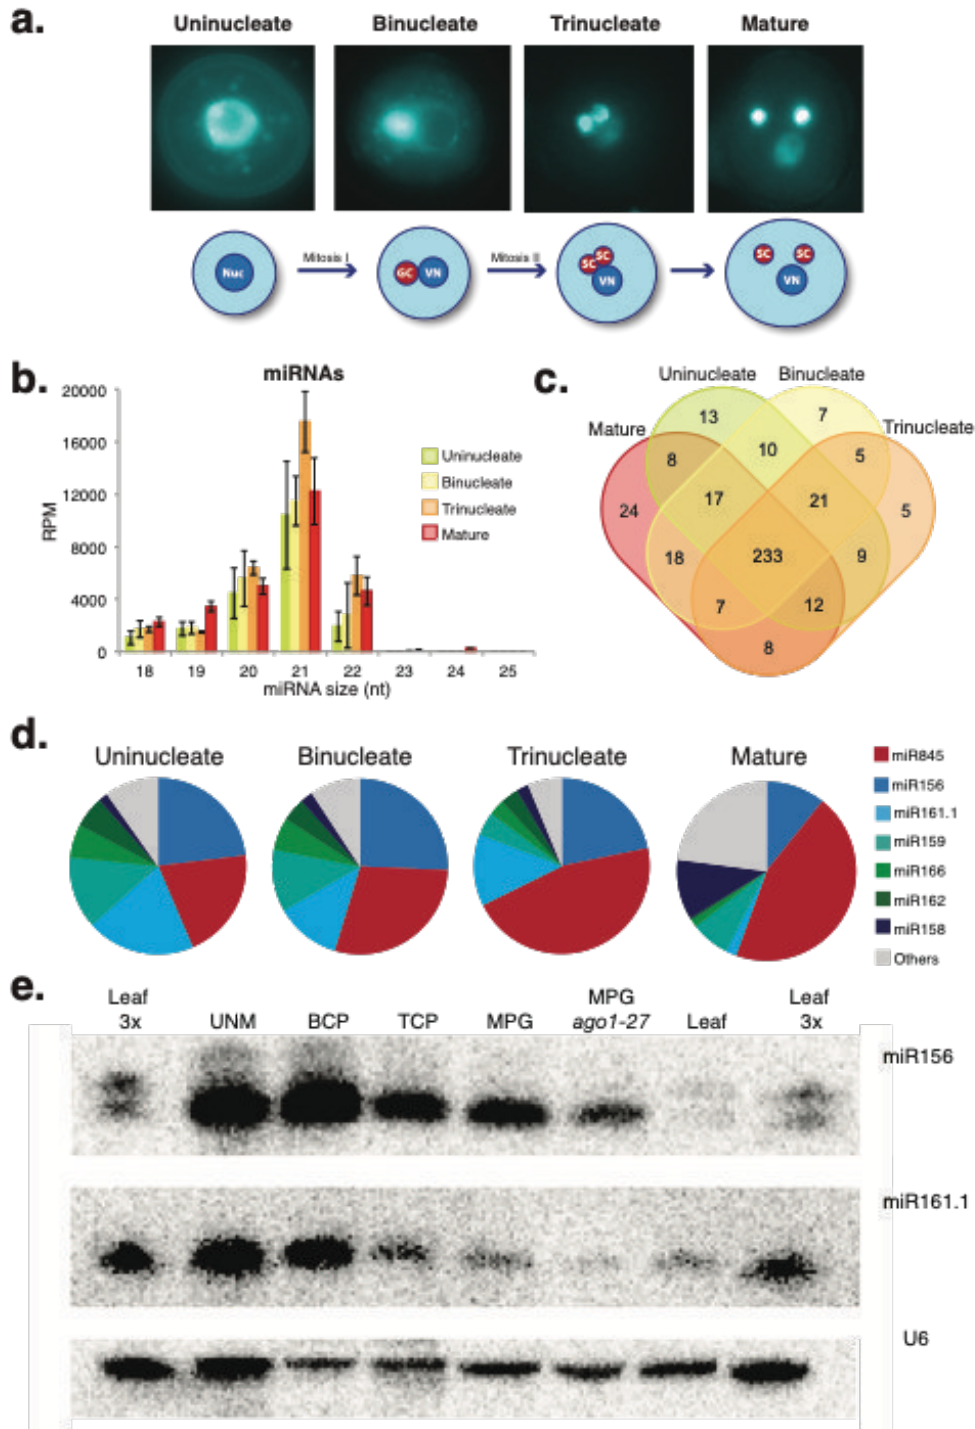

139  
140  
141  
142  
143  
144  
145  
146

**Figure 1.** miRNome dynamics during pollen development: a) Representative images of the pollen developmental stages analyzed here. b) microRNA size distribution and accumulation for the developmental stages shown in a. c) Venn diagram showing the common and developmental stage-specific miRNAs for the stages indicated. d) Pie charts depicting the accumulation of main miRNAs during pollen development for each developmental stage. e) Northern blot showing the decrease in accumulation of two developmentally related miRNAs miR156 and miR161.1. The U6 small nuclear RNA was used as a control for RNA loading.

147 **AGO1 and AGO5 loading explains miRNA enrichment in the mature pollen**  
148 **grain**

149  
150 miRNA loading into AGO proteins determines their effect at the cellular level<sup>19</sup>.  
151 Several AGO proteins have been reported to be active in the male gametophyte,  
152 including AGO1, AGO2, AGO4, AGO5, and AGO9<sup>16,20-22</sup>, but the sRNA  
153 populations loaded into them have not been studied. To shed light into the  
154 characteristics of the RISC complexes in the pollen grain, we analyzed the  
155 sRNAs bound to the main miRNA-related AGO proteins expressed in the pollen  
156 grain: AGO1 and AGO5 (Supplementary Figure 2). In the mature pollen grain,  
157 these two AGOs have a different cellular localization; while AGO1 is located in  
158 the vegetative nucleus and in the vegetative cell (VC)<sup>23</sup>, AGO5 accumulates in  
159 the sperm cell (SC) cytoplasm<sup>16</sup>. We investigated the cellular localization of both  
160 AGOs during pollen grain development and found that AGO1 is present already  
161 in the cytoplasm of unicellular pollen at the uninuclear stage and this expression  
162 pattern is maintained in the VC until the mature stage (Figure 2a). On the other  
163 hand, AGO5 was only detectable in the GC/SCs at the late binuclear/early  
164 trinuclear stage (Figure 2a). Next, we identified the sRNAs loaded into both  
165 AGOs by sequencing of sRNAs that were immunoprecipitated using AGO-  
166 specific antibodies. In line with their predicted role, we detected enrichment for  
167 miRNAs in the immunoprecipitated sRNAs compared to their input controls  
168 (Figure 2b). Both AGOs shared a proportion of their respective miRNomes  
169 (54.5% and 61.3% for AGO1 and AGO5, respectively, Figure 2c), in particular  
170 both had a strong preference to load miR845 family members (37.3% and 71.3%  
171 of the total miRNome for AGO1 and AGO5 respectively). AGO1 also loaded a  
172 substantial fraction of miRNAs with well-known roles in developmental  
173 processes, like miR158 (12.4%), miR159 (9.5%), miR156 (8.5%), miR403 (6%),  
174 and miR168 (4.8%), while AGO5 loaded only a small fraction of developmental-  
175 related miRNAs, like miR156 (5.9%) or miR158 (5.6%) (Figure 2d). This different  
176 miRNA-loading pattern might reflect the different roles of both AGOs in relation to  
177 their cellular localization, with AGO1 being required to regulate the  
178 developmental program and post-transcriptional activity of TEs in the VC<sup>20,24</sup>,  
179 AGO5 might mediate specifically TE control in the SCs<sup>9</sup>. This correlates with the  
180 known role of the VC in the regulation of pollen development and germination<sup>25</sup>.  
181 In summary, both, the cellular localization of AGO1 and AGO5 and their loaded  
182 miRNAs correlate with two different programs mediating the regulation of  
183 development and TEs respectively.

184  
185  
186  
187  
188  
189  
190  
191  
192

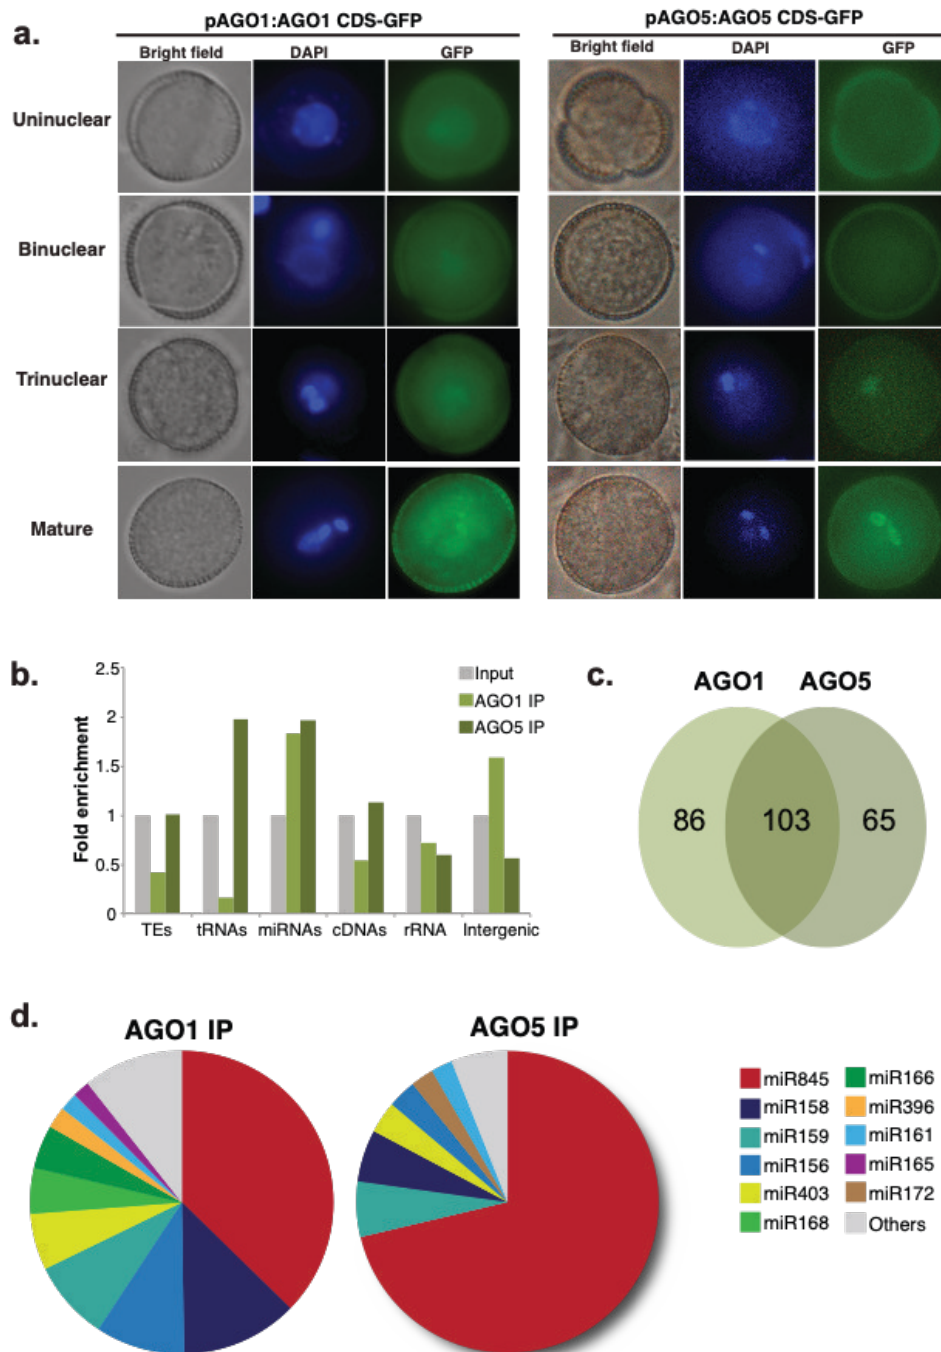

193  
194  
195  
196  
197  
198  
199  
200  
201  
202

**Figure 2:** Comparison of AGO1 and AGO5 loaded miRNAs. a) Analysis of the cellular localization of AGO1 and AGO5-GFP fusion proteins during pollen development. b) Analysis of the enriched categories for sRNAs between 18 and 28 nts for AGO1 and AGO5 immunoprecipitated sRNAs compared to their respective input control. c) Venn diagram showing the number of common and exclusive miRNAs for each AGO protein. d) Pie chart depicting the miRNAs loaded preferentially on each of the AGO proteins under study.

## 203 **Inhibition of miRNA activity affects pollen development**

204

205 To evaluate the level of influence of miRNAs on pollen grain development, we  
206 aimed to inhibit their activity at late stages of pollen development where AGO1  
207 and AGO5 primarily accumulate (Figure 2a). Strong AGO1 mutant alleles fail to  
208 develop viable gametes<sup>14</sup>. We hypothesize that overexpression of a viral  
209 silencing suppressor using specific promoters would drive a cell-specific  
210 reduction in AGO1 activity as previously reported<sup>20</sup>. The Tombusvirus silencing  
211 suppressor P19 is a well-studied protein that inhibits miRNA/miRNA\* duplex  
212 action<sup>26</sup>. Accordingly, we expressed P19<sup>27</sup> fused to RFP under the control of the  
213 *KRP6* promoter to drive the expression at late stages of development of the  
214 pollen grain VC<sup>28</sup> (Figure 3a). *KRP6pro::P19-RFP* transgenic lines had defects in  
215 pollen development with many of the mature pollen grains aborted at maturity  
216 (Figure 3b) and inhibition of pollen grain germination (Figure 3c). In brief,  
217 inhibition of miRNA activity in the male gametophyte VC supports a role of VC  
218 miRNAs in the posttranscriptional regulation of genes required for pollen  
219 development.

220

## 221 **AGO1 and AGO5 are required for the triploid block response**

222

223 Gametic sRNAs establish hybridization barriers in different species<sup>29,30</sup>. In  
224 plants, polyploidization establishes hybridization barriers due to unbalanced  
225 expression of imprinted genes in the endosperm<sup>31-35</sup>, in a phenomenon known  
226 as the triploid block<sup>36</sup>. In *Arabidopsis*, the triploid block is established upon  
227 crosses of a pollen donor forming 2n pollen with a diploid maternal plant.  
228 Depletion of the major Pol IV subunit *NRPD1A* or the miRNA gene *MIR845B*  
229 suppresses the triploid block response<sup>9,37-39</sup>. To test whether the miRNA  
230 populations loaded in AGO1 or AGO5 are responsible for establishing the triploid  
231 block, we created tetraploid versions of the AGO1 weak allele *ago1-27* and of the  
232 AGO5 alleles *ago5-1* and *ago5-5* and performed crosses with a wt diploid  
233 mother. The results of those pollinations revealed that paternal tetraploid *ago1-*  
234 *27* weakly, but nevertheless significantly increased triploid seed viability (Figure  
235 3d and e). Similarly, paternal tetraploid *ago5-1* and *ago5-5* significantly increased  
236 triploid seed viability and seed germination (Figure 3d and e) to a similar level as  
237 *ago1*, suggesting that both redundantly function in the triploid block response.  
238 Thus, paternal AGO1 and AGO5 are part of the triploid block response potentially  
239 through their loading of microRNA family members.

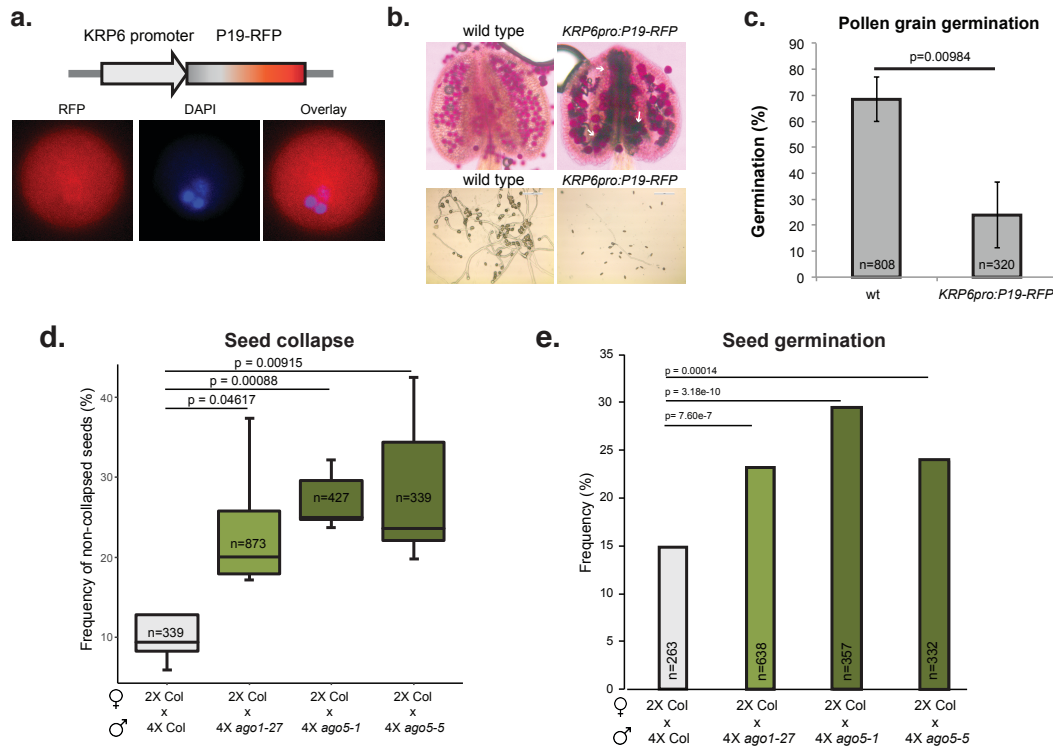

**Figure 3:** Inhibition of miRNA activity in the pollen grain leads to developmental defects of pollen grain development and inhibition of germination. a) Diagram of the construct used to express the viral silencing suppressor P19 in the mature pollen grain and representative image of its accumulation in mature pollen grains. b) Representative pictures of the analysis of pollen defects by Alexander staining and in vitro germination for wt and P19 transgenic plants. Aborted pollen grains clutches are indicated with white arrows. c) Pollen grain germination percentages for wt and KRP6pro:P19-GFP transgenic line. Number of individual pollen grain measurements (n) is shown inside of each bar. Error bars represent the standard deviation values for the three bioreplicates analyzed. P value is the result of a standard t-test with 2 tails and unequal variance. d) Frequency of non-collapsed and e) germinated seeds derived from crosses of wt (2xCol) maternal parents with 4x mutants of indicated genotypes. T-test and Chi-squared test were performed in E and F, respectively. Number of individual seed measurements (n) is shown inside of each bar. Whiskers in the box plots extent to the maximum and minimum values.

### Genome-wide analysis of miRNA-regulated transcripts in the pollen grain

To uncover miRNA-regulated transcripts in the pollen grain, we generated and sequenced PARE libraries from mature pollen grains from Col-0 wild type plants and from mature rosette leaves, as previously described<sup>40</sup> (Supplementary Table 1). PARE is a technique that targets cleaved mRNAs with a polyA tail but without a 5' cap for library preparation and sequencing. A comparison of miRNA-targeted mRNAs between leaf and pollen highlighted the tissue specificity of miRNA regulation, as only 21.5% of pollen miRNA-targeted genes were also miRNA-regulated in the leaf (Fig 4a). These target mRNAs are regulated by miRNAs that are both shared with leaf (68% of all pollen miRNAs) and pollen-specific (representing 32% of the total active miRNAs). A global analysis of pollen miRNA-regulated transcripts revealed that the majority are associated with developmental processes related to transport, cell organization and biogenesis,

240  
241  
242  
243  
244  
245  
246  
247  
248  
249  
250  
251  
252  
253  
254  
255  
256  
257  
258  
259  
260  
261  
262  
263  
264  
265  
266  
267



268 signal transduction, and response to stress (Supplementary Figure 4 and  
269 Supplementary Table 3).

270

271 Pollen miRNA target mRNAs are involved both in pollen grain development and  
272 pollen tube germination and include well-known regulators of these processes  
273 such as *SK32*, *AtbZIP34* and *AFB3* involved in pollen development<sup>41-43</sup>, or  
274 *MYB97*, *MYB101*, and *SYP131* involved in pollen tube germination<sup>44,45</sup>. miRNAs  
275 with a higher number of targeted transcripts included juvenile-to-adult phase  
276 transition related miR172<sup>46</sup> and miR159<sup>47</sup> (13.5 and 10% of targeted genes) and  
277 also the pollen specific miR5021 (10% of targeted genes) (Figure 4b). miRNA  
278 targets included classic miRNA-regulated genes, such as the *TAS* genes or  
279 miR172-targeted transcription factors *APETALA2 (AP2)* and *TARGET OF*  
280 *EARLY ACTIVATION TAGGED (EAT) 2 (TOE2)* (Supplementary Figure 4). We  
281 also detected pollen-specific targeting events like the targeting of *SKU5 SIMILAR*  
282 *12 (SKS12)* by miR5021 or *ETHYLENE-INSENSITIVE3 (EIN3)* by miR5015  
283 (Supplementary Figure 3 and Supplementary Table 4). In other organisms,  
284 miRNA targeting in the gametes increases the stability of targeted transcripts<sup>48</sup>.  
285 We explored if a similar scenario may apply to *Arabidopsis*. The distribution of 5'-  
286 P end reads in a 100 nt window from the predicted target site shows that most of  
287 these targeting events resulted in cleavage of the target RNAs without evidence  
288 of ribosomal stalling (Figure 4c). All these evidences show that miRNA activity in  
289 the pollen grain induces the cleavage of transcripts involved in pollen grain  
290 development and germination.

291

292 To test this observation, we obtained homozygous mutants for two of the genes  
293 specifically regulated by miRNAs in pollen identified in our PARE analysis:  
294 *SKS12* (AT1G55570, mutant termed *skS12-1*, Supplementary Figure 4) and *EIN3*  
295 (AT3G20770, *ein3-1*)<sup>49</sup> (Figure 4d) and evaluated the ability of their mature  
296 pollen grain to germinate *in vitro* (Figure 4e). Measurement of pollen tube length  
297 and germination rate after 16 hrs of incubation indicated that while only *ein3-1*  
298 was affected in the rate of pollen germination (Figure 4g), both mutants were  
299 impaired in pollen tube growth (Figure 4f). Thus, we conclude that miRNAs  
300 regulate developmental processes that are important for pollen development and  
301 pollen grain germination.

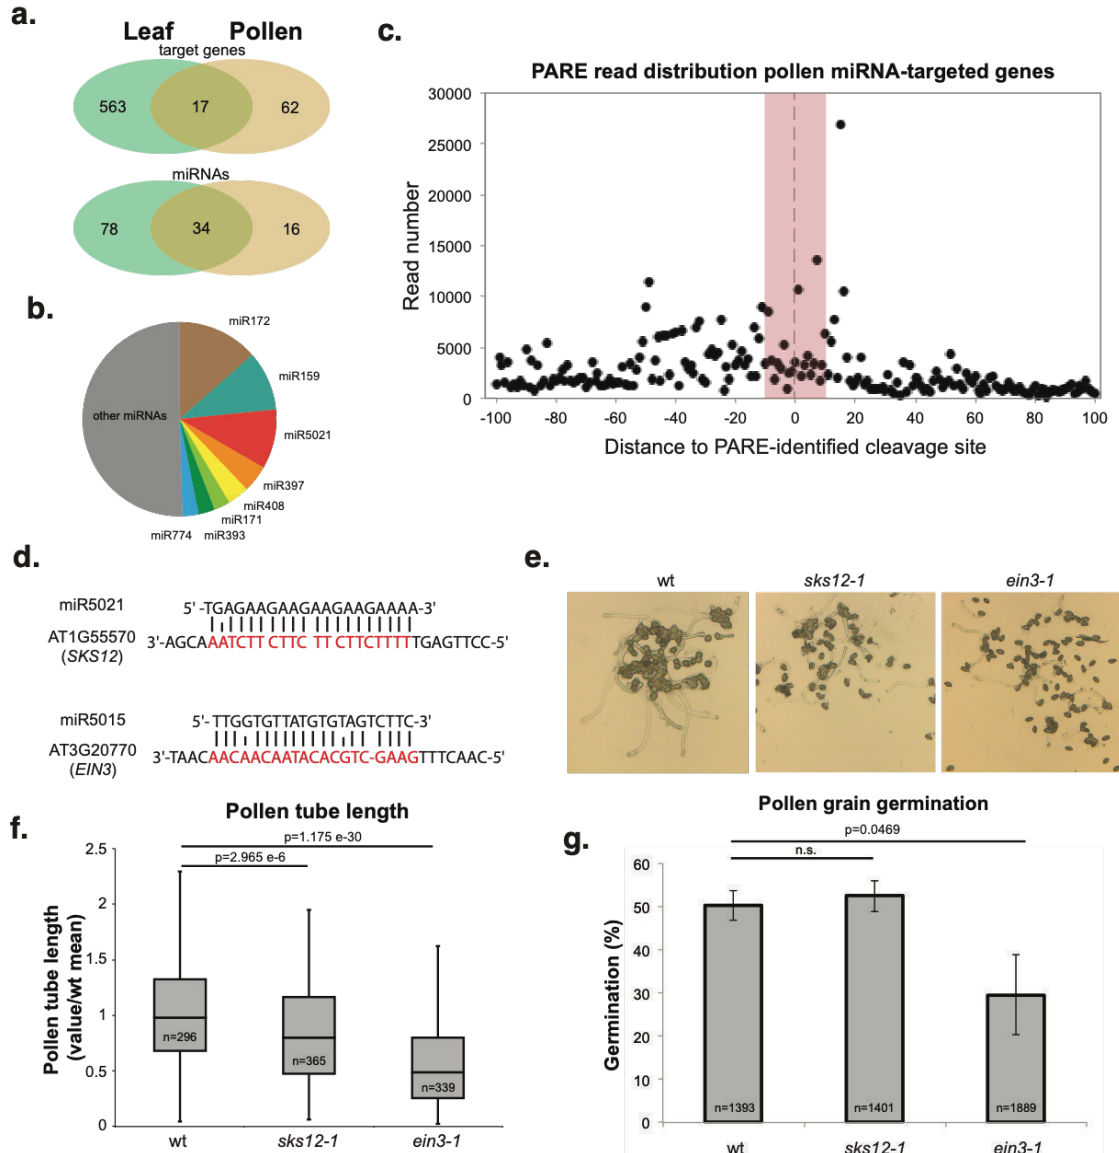

**Figure 4:** Analysis of miRNA genic targets in the mature pollen grain identified by PARE sequencing: a) Venn diagrams showing the common and tissue specific target genes and active miRNAs for the tissues analyzed. b) Pie chart showing highly represented miRNA target sites on PARE confirmed miRNA target genes. c) Distribution of 5' ends of PARE reads around the predicted cleavage site (located at coordinate 0 in the X axis) in a 100 nt window. Red zone represents the physical position covered by the bound miRNA. d) Examples of two miRNA targets in our PARE analysis: SKS12-miR5021 and EIN3-miR5015. e) Representative pictures of pollen grain germination for wt and the *sks12-1* and *ein3-1* mutants. f) Length of the pollen tube and g) percentage of germination for in vitro germinated pollen grains for the genotypes indicated. Number of individual pollen grain measurements (n) is shown inside of each bar. Error bars in h represent the standard deviation values for the three bioreplicates analyzed. P value is the result of a standard t-test with 2 tails and unequal variance. Whiskers in the box plots extent to the maximum and minimum values.

302  
303  
304  
305  
306  
307  
308  
309  
310  
311  
312  
313  
314  
315  
316  
317  
318

319 **miR845-targeted TEs progressively decrease their level of 24 nt sRNAs**  
320 **during pollen development**

321  
322 miRNAs have been identified as important posttranscriptional regulators of  
323 TEs<sup>7,9</sup>. In particular, the miR845 family is involved in the biogenesis of  
324 epigenetically-active siRNAs (easiRNAs) through the targeting of the primer  
325 binding site (PBS) of TEs<sup>9</sup>. This miRNA family is composed by two members,  
326 miR845a and miR845b, which are 21 and 22 nts in length, respectively<sup>9</sup>.  
327 Analysis of their presence in our pollen development sRNA libraries showed that,  
328 during pollen development, the two members of the miR845 family increased  
329 their accumulation, especially miR845a which increased by 2.7 fold (Figure 5a).  
330 Both miRNAs did not seem to be affected by fluctuations of the processing  
331 precision and were of the expected size at all stages of development  
332 (Supplementary Figure 5). Interestingly, the 5' terminal nucleotide of miR845a  
333 and b (C and T respectively, Figure 5b) suggests a preferential loading in AGO5  
334 and AGO1, respectively<sup>50</sup>. We analyzed if this predicted differential loading was  
335 detectable in our AGO1 and AGO5 IP sRNA libraries and, indeed, AGO5 showed  
336 a clear preferential loading of miR845a (62% of AGO5 IPed sRNA sequences,  
337 Figure 5c).

338  
339 Members of the miR845 family were proposed to trigger Pol IV-dependent easiRNA  
340 biogenesis during meiosis or early gametogenesis<sup>9</sup>. Analysis of easiRNAs  
341 derived from miR845-targeted TEs indicates that easiRNAs accumulate to high  
342 levels already at the unicellular stage (Figure 5d). As expected from its  
343 preferential loading in AGO1, miR845b targeted-TEs produce easiRNAs earlier  
344 and to a greater extent than miR845a targets (Supplementary Figure 5).  
345 Interestingly, during pollen grain development there is a gradual transition from a  
346 majority of 24 nts at the unicellular stage to a majority of 22 nts at pollen maturity  
347 (Figure 5d-e). This shows that, most probably, miR845-dependent easiRNA  
348 biogenesis takes place after meiosis progressively during the two rounds of  
349 pollen mitosis. This tendency of losing 24 nt sRNAs during pollen grain  
350 development and gaining 21/22 nt sRNAs is common for all TEs (Figure 5f-g),  
351 revealing that similar mechanisms to miR845 targeting might exist for all TEs.  
352 Unfortunately, TE-targeted by miR845 could not be confirmed using our PARE  
353 sequencing (Supplementary Table 4) since PARE libraries are prepared from  
354 polyadenylated transcripts<sup>40</sup> and miR845 targets non-polyadenylated Pol IV  
355 transcripts<sup>9</sup>. This fact is in agreement with the prediction that miR845 family  
356 members target exclusively Pol IV transcripts<sup>9</sup>. Overall, these results show that  
357 TEs tend to loss 24 nts while gaining 21/22 nt sRNAs during pollen development  
358 in correlation with an increase in the accumulation of miR845 family members.

359  
360  
361  
362

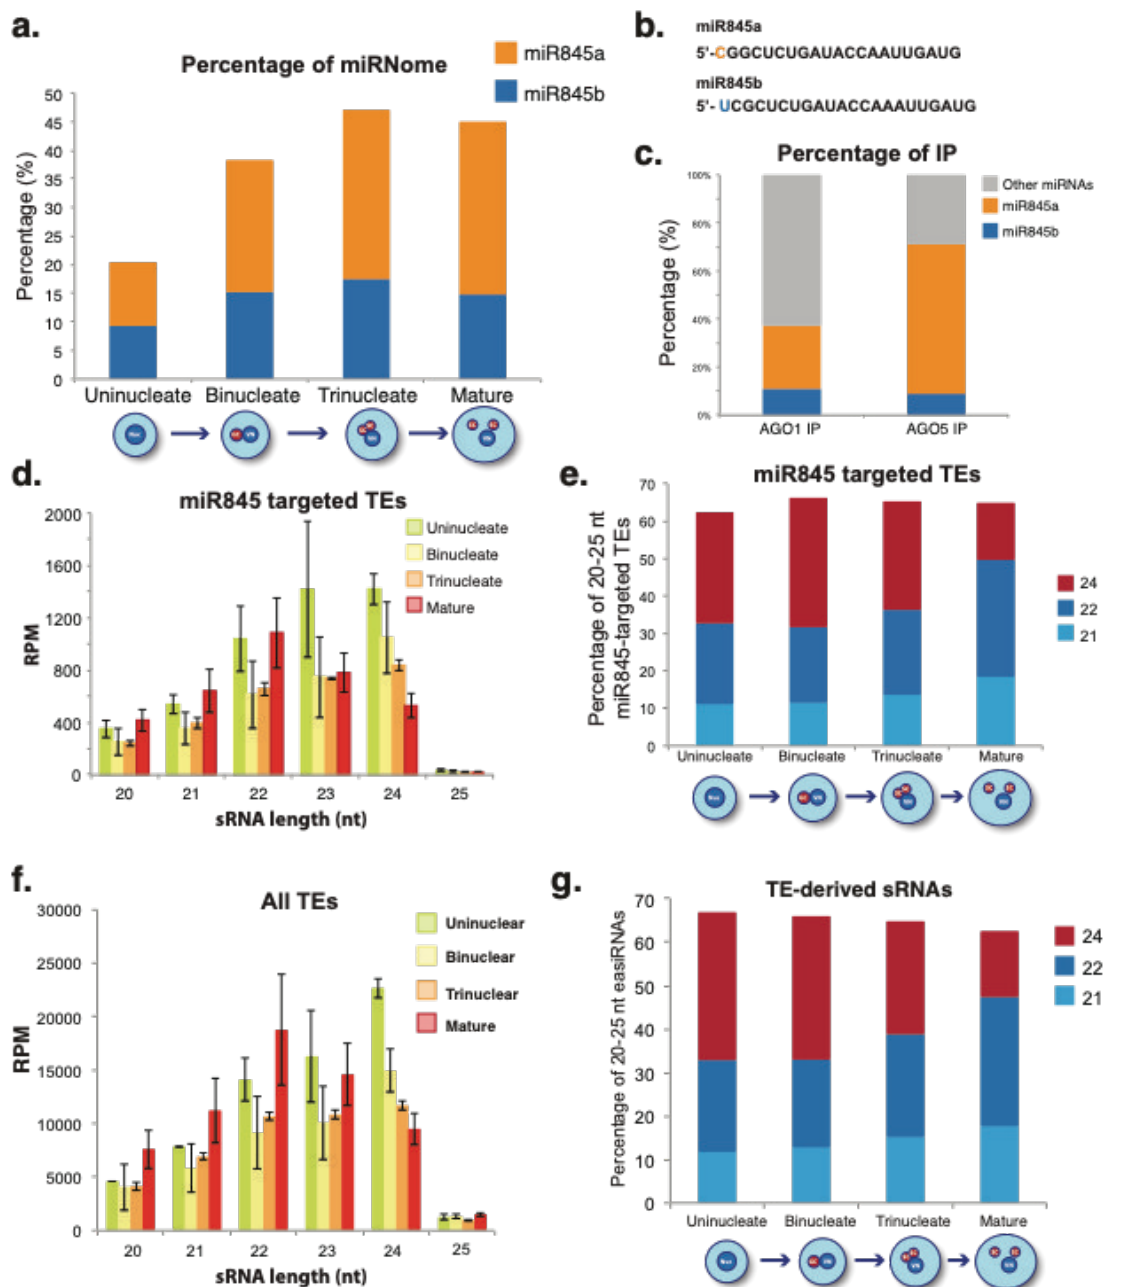

363  
364  
365  
366  
367  
368  
369  
370  
371  
372  
373  
374

**Figure 5:** Analysis of miR845 dynamics and its target TEs during pollen development. a) Accumulation percentages for miR845a and b during pollen development. b) Sequence comparison of miR845a and b with the 5' nucleotide highlighted. c) Percentage of the impact of miR845 a and b on total AGO1 and AGO5 immunoprecipitated miRNAs. d) Accumulation size profile of TE-derived siRNAs of predicted miR845-targeted TEs. e) Accumulation of 21,22 and 24 nt sRNAs from miR845-targeted TEs during pollen development shown as percentages of total 20-25 nt sRNAs derived from those TEs. f) Accumulation profile of all TE-derived sRNAs. g) Accumulation of 21,22 and 24 nt sRNAs from TEs during pollen development shown as percentages of total 20-25 nt easiRNAs.

375 **PARE sequencing analysis identified a pool of Pol II-transcribed and**  
376 **miRNA-regulated TEs**

377  
378 Although our PARE libraries could not be used to identify miR845-targeting  
379 events, they allowed the identification of miRNA-targeted polyadenylated TE  
380 transcripts. We identified a number of miRNA-targeted TEs (Supplementary  
381 Table 4), strongly suggesting that Pol II transcribes these TEs. Interestingly,  
382 these TEs were targeted mostly by pollen-specific miRNAs like miR5021,  
383 miR5658 and miR5645 (that together represent 58% of the targeting events  
384 identified) (Figure 6a). Similar to the targeting of genic mRNAs, distribution of  
385 reads in a 100 nt window from the PARE-identified cleavage site for TEs  
386 revealed a clear preference for RNA cleavage (Figure 6b). Most of these TEs  
387 localized to euchromatic regions (57.5%, Figure 6d) and belonged to the MuDR,  
388 Copia, En-Spm and Gypsy families (82% of total miRNA-targeted TEs, Figure  
389 6c). miRNA-targeted TEs dramatically lost 24 nts during the transition from  
390 unicellular to bicellular pollen (Figure 6e), revealing that their regulation is  
391 different from the rest of TEs (Figure 5f).

392  
393 Next, we analyzed the levels of DNA methylation of PARE-identified miRNA-  
394 targeted TEs during pollen development<sup>51</sup> and its potential connection to their  
395 sRNA levels using publicly available data (Supplementary Table 5). miRNA-  
396 targeted TEs have significantly lower levels of CHH methylation at the unicellular  
397 stage compared to the rest of TEs (Figure 6f), pointing to their dependence on  
398 the RdDM pathway to retain sRNA-based CHH methylation. At the mature  
399 developmental stage, these TEs retain significant higher levels of CG methylation  
400 in the VN compare to other TEs (Figure 6g) while maintain low levels of CHH  
401 methylation in the SCs (Supplementary Figure 6). Altogether this may indicate  
402 that this group of TEs is not a target of DME-mediated demethylation in the VN.  
403 Subsequently, analysis of DNA methylation in the VN of *dme* mutants confirmed  
404 that miRNA-targeted TEs are indeed not targeted by DNA glycosylases (Figure  
405 6h), which translates into maintenance of low CHH methylation in the SCs  
406 (Supplementary Figure 6). Altogether, our data points to the existence of Pol II-  
407 transcribed TEs during pollen epigenetic reprogramming that are not targeted by  
408 DME but are regulated by miRNAs.

409  
410  
411  
412  
413  
414  
415  
416  
417  
418  
419  
420

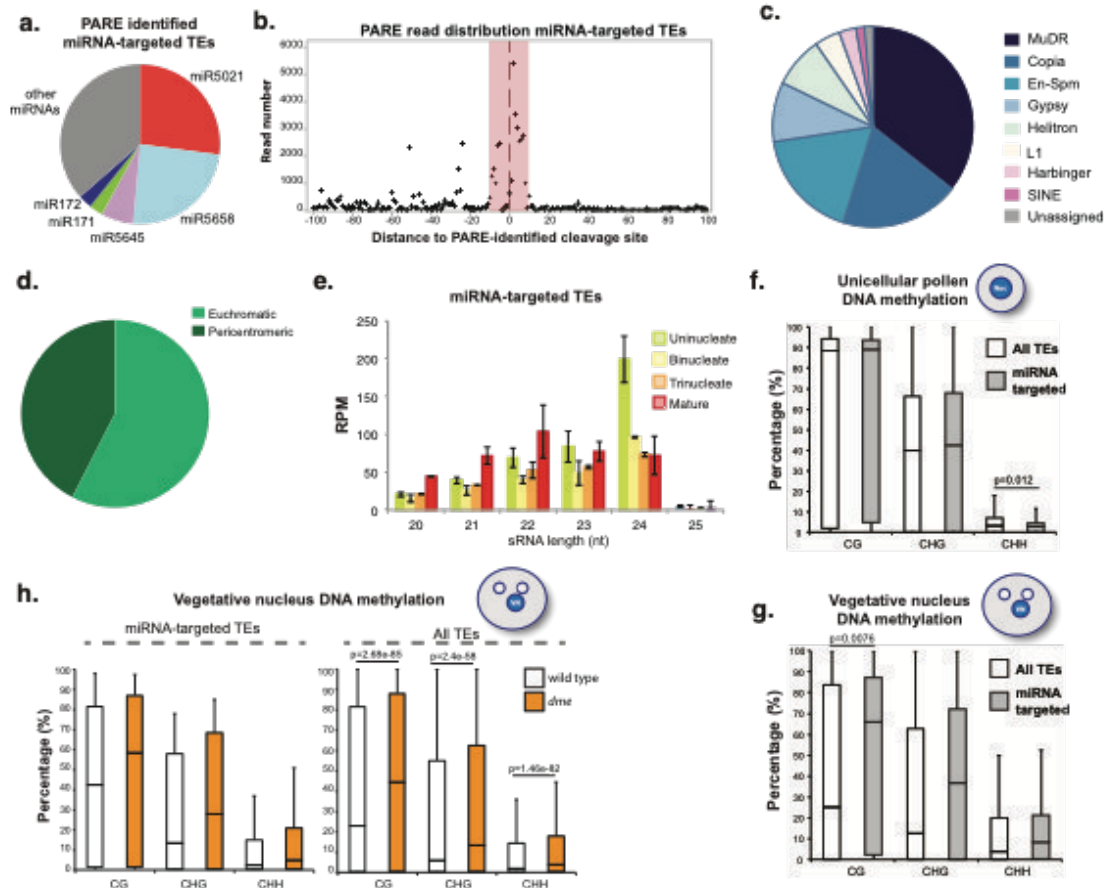

421  
 422 **Figure 6:** Analysis of miRNA TE targets in the mature pollen grain identified by PARE sequencing. a) Pie  
 423 chart showing highly represented miRNA target sites on PARE confirmed miRNA-targeted TEs. b) Global  
 424 distribution of 5' ends of PARE reads around the predicted cleavage site for TEs (located at coordinate 0 in  
 425 the X axis) in a 100 nt window. Red zone represents the physical position covered by the mRNA-bound  
 426 miRNA. c) Family categorization and d) genomic distribution of miRNA-targeted TEs. e) sRNA accumulation  
 427 size profile for TEs predicted to be targeted by miRNAs and transcribed by Pol II. f-g) Levels of cytosine  
 428 methylation for the different contexts (CG, CHG and CHH) in the unicellular pollen grain (f) and vegetative  
 429 nucleus (g) for all TEs (white boxes) or miRNA-targeted TEs (grey boxes). h) Levels of cytosine  
 430 methylation for the different contexts (CG, CHG and CHH) in the vegetative nucleus for miRNA-targeted TEs (left panel)  
 431 or all TEs (right panel) in wild type (white boxes) and *dme* (orange boxes). In all graphs, P value is the result  
 432 of a standard t-test with 2 tails and unequal variance. Only significant differences between measurements  
 433 are highlighted in the graphs. Whiskers in the box plots extent to the maximum and minimum values.

434

### 435 **The miRNome adjusts during pollen development to adapt the regulation of** 436 **genic and TE targets**

437 Finally, to understand the role of the identified active miRNAs during pollen  
 438 development, we studied in detail their accumulation patterns in our sRNA  
 439 libraries from different stages of pollen development. During pollen maturation,  
 440 the majority of miRNAs regulating genes and TEs (and the common miRNAs  
 441 between both groups, Supplementary Figure 7a) maintained or decreased their  
 442 level of accumulation (65.7%, Figure 7a and Supplementary Figure 7b-c). This  
 443 decrease was especially evident at the tricellular stage where the SCs appear in  
 444 the VC and AGO5 accumulation was evident (Figure 2A). Interestingly, the  
 445 members of the miR845 family followed the opposite trend, with a progressive  
 446 accumulation during pollen development (Figure 7a). In parallel with the

447 decrease of Pol II-active miRNA accumulation, their genic targets increased their  
 448 expression towards maturity of the pollen grain (Figure 7c). The level of  
 449 expression of these miRNA-target genes was even maintained during pollen  
 450 grain germination (Figure 7c), indicating that miRNAs regulating genic products  
 451 in the pollen grain have an important role in the overall regulation of transcripts  
 452 available for pollen development and germination.

453

454 The analysis of the two populations of active miRNAs present in our AGO  
 455 immunoprecipitated libraries helped to understand to a better extent their role  
 456 during pollen development (Figure 7b). AGO1 tended to load a mix of miRNAs  
 457 involved both in the regulation of development (36.6%) and TEs (44 %) (Figure  
 458 7b). On the other hand AGO5 loads a majority of miRNAs involved exclusively in  
 459 the regulation of TEs (82%, Figure 7b). In summary, overall, our analysis shows  
 460 that during pollen development there is a transition from a diverse miRNA pool  
 461 that regulates both development and Pol II-transcribed TEs, probably loaded in  
 462 AGO1, to a miRNA pool that, at maturity, controls Pol IV-transcribed TEs  
 463 monopolized by miR845 and with preferential loading in AGO5.

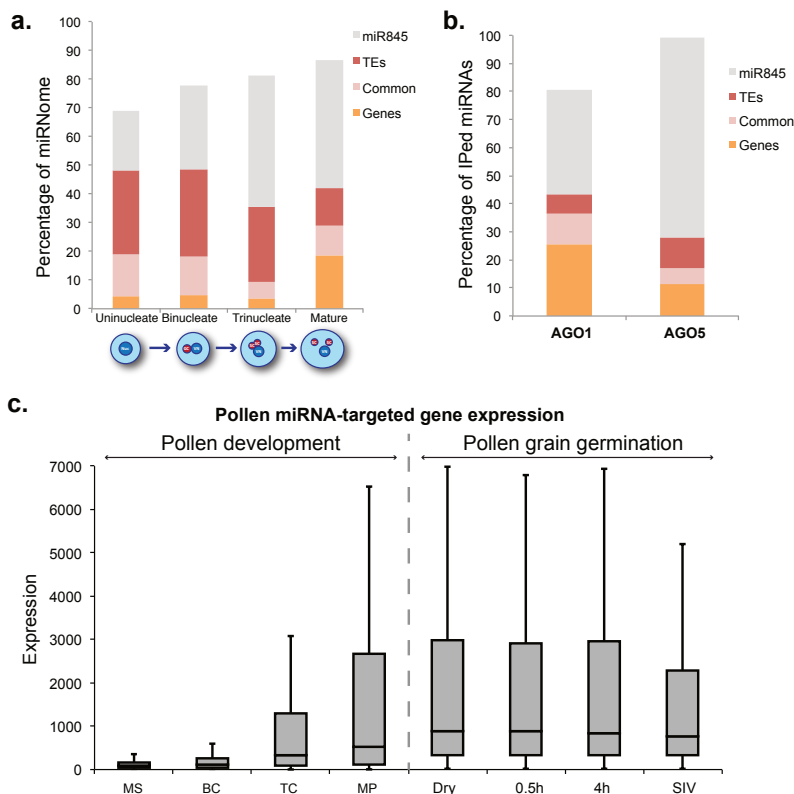

464

465 **Figure 7.** a) Distribution of miR845 family and PARE-identified miRNAs targeting TEs, miRNAs or both  
 466 (termed common) during pollen development. Accumulation values are represented as percentage of the  
 467 total miRNome. b) Presence of miR845 family and PARE-identified miRNAs targeting TEs, miRNAs or both  
 468 (termed common) in AGO1 and 5 immunoprecipitated sRNAs. c) Level of expression of miRNA target genes  
 469 during pollen development and pollen grain germination present in the ATH1 microarray (MS= microspore,  
 470 BC= bicellular pollen, TC= tricellular pollen, MP= mature pollen grain, Dry= Dessicated mature pollen, 0.5h=  
 471 In vitro-germinated pollen grains after 30 minutes, 4h= In vitro-germinated pollen grains after 4 hours and  
 472 SIV= Pollen tubes grown through the stigma and style). Whiskers in the box plots extent to the maximum  
 473 and minimum values.

474

## 475 Discussion

476 Through the use of pollen stage separation combined with high-throughput sRNA  
477 sequencing, PARE sequencing and the characterization of several  
478 characteristics of pollen grain development, we have (1) identified the  
479 characteristics of the miRNome during pollen grain development, (2) determined  
480 the miRNA populations loaded into the main AGO proteins in the pollen grain,  
481 AGO1 and AGO5, (3) identified miRNA targets (both TEs and genes) and (4)  
482 identified the involvement of both AGO1 and AGO5 in the triploid block. Our data  
483 reveal that the miRNome experiences a reprogramming during pollen  
484 development, transitioning from a miRNome mainly involved in developmental  
485 control to a miRNA population focused on the transcriptional control of TEs.

486

487 The pollen grain undergoes both a transcriptional and epigenetic reprogramming  
488 during its transition to maturity, but whether the first is a consequence of the  
489 latter is unknown<sup>24,51,52</sup>. Our data indicates that miRNAs also experience a  
490 reprogramming, which could influence the transcriptional and epigenetic changes  
491 taking place in this tissue. Reduction of miRNAs in the pollen grain via the  
492 expression of the P19 viral silencing suppressor strongly reduced pollen grain  
493 viability and germination (Figure 3). Indeed our identification of miRNA target  
494 mRNAs in the pollen grain of *Arabidopsis* (Figure 4 and 6) through PARE  
495 sequencing shows their importance in the regulation of both genes and TEs.

496

497 In this tissue, genes targeted by miRNAs had a higher level of expression in the  
498 mature pollen stage and were involved in processes related with pollen  
499 germination (Figure 7c). Although this might suggest that gametic miRNAs  
500 increase the stability of transcripts, similar as previously observed in *C.elegans*<sup>48</sup>,  
501 our PARE data indicates that most probably the miRNA targeting events  
502 identified here induce the cleavage of their target mRNAs (Figure 4c), showing  
503 that developmental miRNA targets in pollen are expressed at high levels and  
504 miRNA targeting dampens their expression (Figure 7a-c, model shown in  
505 Supplementary Figure 8). As a proof of concept, we analyzed the defects in  
506 pollen grain germination experienced by two miRNA target genes identified in our  
507 analysis: *SKS12* and *EIN3* (Figure 4d-g).

508

509 Additionally we have explored the influence of the miRNome on the epigenetic  
510 regulation of TEs in the pollen grain. During pollen grain development the  
511 miR845 family members (miR845a and b) increase in abundance (Figure 1d).  
512 This increase likely results in the preferential loading of these two miRNAs in  
513 AGO5, a highly abundant AGO protein in the sperm cells (Figure 2a). miR845  
514 members have been proposed to target Pol IV transcripts of several  
515 retrotransposons and induce the production of 21/22 easiRNAs from those  
516 transcripts<sup>9,37</sup>. Our analysis indicates that indeed simultaneous to the increase in  
517 the accumulation of miR845 members during pollen development, there is a  
518 parallel decrease of 24 nt sRNAs from their targets and a progressive increase of  
519 21/22 nt sRNAs (Figure 5d-e), potentially a consequence of their targeting.



520 Nevertheless, this needs to be tested since our PARE sequencing excluded non-  
521 polyadenylated RNAs. Interestingly, the preferential loading of miR845 by AGO5  
522 correlates with low levels of CHH methylation in the SCs<sup>51</sup>. Due to the proposed  
523 role of miR845 in targeting of Pol IV transcripts<sup>9</sup>, we speculate that increased  
524 presence and activity of this miRNA in the SCs upon AGO5 loading impairs CHH  
525 methylation establishment. Interestingly, both AGO1 and AGO5 are able to  
526 weakly rescue the triploid block-induced seed collapse (Figure 3d-e), which might  
527 be the consequence of their redundant ability to load miR845 family members.

528  
529 Together with this, our PARE sequencing and analysis has identified a series of  
530 transposons that were transcribed by Pol II and regulated by miRNAs (Figure 6).  
531 These transposons are likely regulated primarily by the RdDM pathway, due to  
532 their strong loss of 24 nt sRNAs and low values of CHH methylation in the  
533 unicellular stage (Figure 6c-f). Furthermore, miRNA-targeted TEs in the pollen  
534 grain seemed to not DME-mediated demethylation in the VN since they keep  
535 significantly higher CG methylation levels compared to the rest of TEs in the VN  
536 and their C-methylation values in the VN are not affected in a *DME* mutant  
537 (Figure 6f-h). We speculate that miRNA-targeting for these TEs might be a  
538 safeguard mechanism to avoid their spurious expression.

539  
540 In summary, our work highlights the relevance of miRNAs for the developmental  
541 and epigenetic events that occur during the pollen grain development. The pollen  
542 grain needs to face the duality of reprogramming the transcriptome and  
543 epigenome of the newly established gametes in the sperm cells, while  
544 accomplishing a complex developmental program that culminates in the  
545 germination of the pollen tube and the successful transfer of the male gametes to  
546 the female gametophyte. Like in plants, in mouse and human cell lines changes  
547 in DNA methylation and miRNAs are an important part of the reprogramming of  
548 cells to pluripotency<sup>53-55</sup>, which might be also linked to a potential miRNA control  
549 of DNA methylation, cell cycle transitions and regulation of apoptosis<sup>56,57</sup>. Our  
550 work highlights that the complexity of the orchestration of the miRNome is not  
551 exclusive of mammalian reprogramming for pluripotency, but also takes place  
552 during reproductive reprogramming in plants.

553

## 554 **Methods:**

555

### 556 **Plant material**

557 Plants were grown under standard long day conditions at 22 °C. The mutant  
558 alleles used in this study were *ein3-1* (NASC accession number: N8052), *sks12-*  
559 *1* (SALK\_061973) and *ago1-27*. The *KRP6pro:P19-RFP* transgene construction,  
560 plant transformation and selection were performed as described in Martinez et al  
561 (2016). Primers used for cloning are shown in Supplementary Table 6.

562

### 563 **Total RNA, sRNA Northern blot AGO immunoprecipitation and sRNA/PARE** 564 **library construction**

565 Total RNA was isolated using TRIzol reagent (Life Technologies). For microRNA  
566 Northern blot detection, 5 µg of total RNA were loaded in each lane for pollen  
567 developmental stage Northern blots. sRNA gel electrophoresis, blotting, and  
568 cross-linking were performed as described in Pall *et al.* (2008)<sup>58</sup>. The AGO1 and  
569 AGO5 proteins were immunoprecipitated using commercially available polyclonal  
570 AGO1 and AGO5 antibodies (Agrisera AB). AGO immunoprecipitated sRNA  
571 libraries were constructed as indicated in McCue *et al.* (2012) adapted to pollen  
572 tissue. PARE libraries were constructed following the protocol described in Zhai  
573 *et al.* (2014) adapted to pollen tissue. All sRNA libraries were made using the  
574 NEBNext Small RNA Library Prep Set for Illumina (New England Biolabs)  
575 following the manufacturer instructions and using gel-enriched sRNAs as  
576 described in Martinez *et al.* (2016).

577

### 578 **Pollen grain separation, germination, viability test and microscopy.**

579 Pollen grain separation was performed as described in Dupl'akova *et al.* (2016).  
580 The pollen developmental stages used for sRNA sequencing correspond to the  
581 fractions termed B1 (Unicellular), B3 (Bicellular), A3 (Tricellular). Pollen  
582 germination was determined using the media recipe from Rodriguez-Enriquez *et al.*  
583 (2013)<sup>59</sup>. Each germination assay was performed in triplicates. Standard  
584 Alexander staining method was used to visualize pollen grain abortion as  
585 described in Alexander MP (1969)<sup>60</sup>. Visualization of pollen grain germination  
586 and Alexander stained pollen grains was performed in a Leica DM RX  
587 microscope. For pollen grain fluorescence, pollen grains of T3 plants were  
588 mounted on slides containing 50% glycerol and analyzed under a Zeiss Axioplan  
589 or a Leica DMI 4000 microscope fluorescence microscopes.

590

### 591 **Bioinformatic analysis**

592 sRNA libraries were trimmed using Trim Galore. Reads were aligned using  
593 bowtie with the command "bowtie -f -t -v2" that allows two mismatches. The  
594 TAIR10 version of the *Arabidopsis* genome and the miRbase version 21 were  
595 used in this analysis. Reads were normalized to reads per million to the total  
596 reads mapped to the *Arabidopsis* chromosomes. For PARE library analysis,  
597 miRNA cleavage events were identified using PARESnip<sup>61</sup>. For genome-wide  
598 plots of PARE reads, PARE libraries were aligned using bowtie to retain only  
599 perfectly matched reads (0 mismatches). The pericentromeric region limits was  
600 determined using the description from Copenhaver *et al.*, (1999)<sup>62</sup>.

601

### 602 **References**

603

- 604 1 Stefani, G. & Slack, F. J. Small non-coding RNAs in animal development.  
605 *Nat Rev Mol Cell Biol* **9**, 219-230 (2008).
- 606 2 Martens-Uzunova, E. S., Olvedy, M. & Jenster, G. Beyond microRNA--  
607 novel RNAs derived from small non-coding RNA and their implication in  
608 cancer. *Cancer Lett* **340**, 201-211 (2013).
- 609 3 Borges, F. & Martienssen, R. A. The expanding world of small RNAs in  
610 plants. *Nat Rev Mol Cell Biol* **16**, 727-741 (2015).

- 611 4 Axtell, M. J. Classification and comparison of small RNAs from plants.  
612 *Annu Rev Plant Biol* **64**, 137-159 (2013).
- 613 5 Ma, X., Cao, X., Mo, B. & Chen, X. Trip to ER: MicroRNA-mediated  
614 translational repression in plants. *RNA Biol* **10**, 1586-1592 (2013).
- 615 6 Hunter, C. *et al.* Trans-acting siRNA-mediated repression of ETTIN and  
616 ARF4 regulates heteroblasty in Arabidopsis. *Development* **133**, 2973-2981  
617 (2006).
- 618 7 Creasey, K. M. *et al.* miRNAs trigger widespread epigenetically activated  
619 siRNAs from transposons in Arabidopsis. *Nature* **508**, 411-415 (2014).
- 620 8 Surbanovski, N., Brillì, M., Moser, M. & Si-Ammour, A. A highly specific  
621 microRNA-mediated mechanism silences LTR retrotransposons of  
622 strawberry. *Plant J* **85**, 70-82 (2016).
- 623 9 Borges, F. *et al.* Transposon-derived small RNAs triggered by miR845  
624 mediate genome dosage response in Arabidopsis. *Nat Genet* **50**, 186-192  
625 (2018).
- 626 10 Presslauer, C., Tilahun Bizuayehu, T., Kopp, M., Fernandes, J. M. &  
627 Babiak, I. Dynamics of miRNA transcriptome during gonadal development  
628 of zebrafish. *Sci Rep* **7**, 43850 (2017).
- 629 11 Yuan, S. *et al.* Sperm-borne miRNAs and endo-siRNAs are important for  
630 fertilization and preimplantation embryonic development. *Development*  
631 **143**, 635-647 (2016).
- 632 12 McJunkin, K. & Ambros, V. The embryonic mir-35 family of microRNAs  
633 promotes multiple aspects of fecundity in *Caenorhabditis elegans*. *G3*  
634 (*Bethesda*) **4**, 1747-1754 (2014).
- 635 13 Eun, S. H. *et al.* MicroRNAs downregulate Bag of marbles to ensure  
636 proper terminal differentiation in the *Drosophila* male germline.  
637 *Development* **140**, 23-30 (2013).
- 638 14 Kidner, C. A. & Martienssen, R. A. The role of ARGONAUTE1 (AGO1) in  
639 meristem formation and identity. *Dev Biol* **280**, 504-517 (2005).
- 640 15 Jacobsen, S. E., Running, M. P. & Meyerowitz, E. M. Disruption of an  
641 RNA helicase/RNase III gene in Arabidopsis causes unregulated cell  
642 division in floral meristems. *Development* **126**, 5231-5243 (1999).
- 643 16 Borges, F., Pereira, P. A., Slotkin, R. K., Martienssen, R. A. & Becker, J.  
644 D. MicroRNA activity in the Arabidopsis male germline. *J Exp Bot* **62**,  
645 1611-1620 (2011).
- 646 17 Grant-Downton, R. *et al.* MicroRNA and tasiRNA diversity in mature pollen  
647 of Arabidopsis thaliana. *BMC Genomics* **10**, 643 (2009).
- 648 18 Dupl'akova, N., Dobrev, P. I., Renak, D. & Honys, D. Rapid separation of  
649 Arabidopsis male gametophyte developmental stages using a Percoll  
650 gradient. *Nat Protoc* **11**, 1817-1832 (2016).
- 651 19 Hutvagner, G. & Simard, M. J. Argonaute proteins: key players in RNA  
652 silencing. *Nat Rev Mol Cell Biol* **9**, 22-32 (2008).
- 653 20 Martinez, G., Panda, K., Kohler, C. & Slotkin, R. K. Silencing in sperm  
654 cells is directed by RNA movement from the surrounding nurse cell. *Nat*  
655 *Plants* **2**, 16030 (2016).

- 656 21 Oliver, C., Santos, J. L. & Pradillo, M. Accurate Chromosome Segregation  
657 at First Meiotic Division Requires AGO4, a Protein Involved in RNA-  
658 Dependent DNA Methylation in *Arabidopsis thaliana*. *Genetics* **204**, 543-  
659 553 (2016).
- 660 22 Olmedo-Monfil, V. *et al.* Control of female gamete formation by a small  
661 RNA pathway in *Arabidopsis*. *Nature* **464**, 628-632 (2010).
- 662 23 McCue, A. D., Nuthikattu, S., Reeder, S. H. & Slotkin, R. K. Gene  
663 expression and stress response mediated by the epigenetic regulation of a  
664 transposable element small RNA. *PLoS Genet* **8**, e1002474 (2012).
- 665 24 Slotkin, R. K. *et al.* Epigenetic reprogramming and small RNA silencing of  
666 transposable elements in pollen. *Cell* **136**, 461-472 (2009).
- 667 25 Glockle, B. *et al.* Pollen differentiation as well as pollen tube guidance and  
668 discharge are independent of the presence of gametes. *Development* **145**  
669 (2018).
- 670 26 Chapman, E. J., Prokhnevsky, A. I., Gopinath, K., Dolja, V. V. &  
671 Carrington, J. C. Viral RNA silencing suppressors inhibit the microRNA  
672 pathway at an intermediate step. *Genes Dev* **18**, 1179-1186 (2004).
- 673 27 Csorba, T., Kontra, L. & Burgyan, J. viral silencing suppressors: Tools  
674 forged to fine-tune host-pathogen coexistence. *Virology* **479-480**, 85-103  
675 (2015).
- 676 28 Kim, H. J. *et al.* Control of plant germline proliferation by SCF(FBL17)  
677 degradation of cell cycle inhibitors. *Nature* **455**, 1134-1137 (2008).
- 678 29 Martienssen, R. A. Heterochromatin, small RNA and post-fertilization  
679 dysgenesis in allopolyploid and interploid hybrids of *Arabidopsis*. *New*  
680 *Phytol* **186**, 46-53 (2010).
- 681 30 Senti, K. A. & Brennecke, J. The piRNA pathway: a fly's perspective on  
682 the guardian of the genome. *Trends Genet* **26**, 499-509 (2010).
- 683 31 Kradolfer, D., Wolff, P., Jiang, H., Siretskiy, A. & Kohler, C. An imprinted  
684 gene underlies postzygotic reproductive isolation in *Arabidopsis thaliana*.  
685 *Dev Cell* **26**, 525-535 (2013).
- 686 32 Wolff, P., Jiang, H., Wang, G., Santos-Gonzalez, J. & Kohler, C.  
687 Paternally expressed imprinted genes establish postzygotic hybridization  
688 barriers in *Arabidopsis thaliana*. *Elife* **4** (2015).
- 689 33 Jiang, H. *et al.* Ectopic application of the repressive histone modification  
690 H3K9me2 establishes post-zygotic reproductive isolation in *Arabidopsis*  
691 *thaliana*. *Genes Dev* **31**, 1272-1287 (2017).
- 692 34 Wang, G., Jiang, H., Del Toro de Leon, G., Martinez, G. & Kohler, C.  
693 Sequestration of a Transposon-Derived siRNA by a Target Mimic  
694 Imprinted Gene Induces Postzygotic Reproductive Isolation in  
695 *Arabidopsis*. *Dev Cell* **46**, 696-705 e694 (2018).
- 696 35 Huang, F. *et al.* Mutants in the imprinted PICKLE RELATED 2 gene  
697 suppress seed abortion of fertilization independent seed class mutants  
698 and paternal excess interploidy crosses in *Arabidopsis*. *Plant J* **90**, 383-  
699 395 (2017).

- 700 36 Kohler, C., Mittelsten Scheid, O. & Erilova, A. The impact of the triploid  
701 block on the origin and evolution of polyploid plants. *Trends Genet* **26**,  
702 142-148 (2010).
- 703 37 Martinez, G. *et al.* Paternal easiRNAs regulate parental genome dosage in  
704 Arabidopsis. *Nat Genet* **50**, 193-198 (2018).
- 705 38 Erdmann, R. M., Satyaki, P. R. V., Klosinska, M. & Gehring, M. A Small  
706 RNA Pathway Mediates Allelic Dosage in Endosperm. *Cell Rep* **21**, 3364-  
707 3372 (2017).
- 708 39 Satyaki, P. R. V. & Gehring, M. Paternally Acting Canonical RNA-Directed  
709 DNA Methylation Pathway Genes Sensitize Arabidopsis Endosperm to  
710 Paternal Genome Dosage. *Plant Cell* **31**, 1563-1578 (2019).
- 711 40 Zhai, J., Arikait, S., Simon, S. A., Kingham, B. F. & Meyers, B. C. Rapid  
712 construction of parallel analysis of RNA end (PARE) libraries for Illumina  
713 sequencing. *Methods* **67**, 84-90 (2014).
- 714 41 Dong, X., Nou, I. S., Yi, H. & Hur, Y. Suppression of ASKbeta (AtSK32), a  
715 Clade III Arabidopsis GSK3, Leads to the Pollen Defect during Late Pollen  
716 Development. *Mol Cells* **38**, 506-517 (2015).
- 717 42 Gibalova, A. *et al.* AtbZIP34 is required for Arabidopsis pollen wall  
718 patterning and the control of several metabolic pathways in developing  
719 pollen. *Plant Molecular Biology* **70**, 581-601 (2009).
- 720 43 Cecchetti, V., Altamura, M. M., Falasca, G., Costantino, P. & Cardarelli, M.  
721 Auxin regulates Arabidopsis anther dehiscence, pollen maturation, and  
722 filament elongation. *Plant Cell* **20**, 1760-1774 (2008).
- 723 44 Liang, Y. *et al.* MYB97, MYB101 and MYB120 Function as Male Factors  
724 That Control Pollen Tube-Synergid Interaction in Arabidopsis thaliana  
725 Fertilization. *Plos Genetics* **9** (2013).
- 726 45 Slane, D., Reichardt, I., El Kasm, F., Bayer, M. & Jurgens, G.  
727 Evolutionarily diverse SYP1 Qa-SNAREs jointly sustain pollen tube growth  
728 in Arabidopsis. *Plant Journal* **92**, 375-385 (2017).
- 729 46 Wu, G. *et al.* The sequential action of miR156 and miR172 regulates  
730 developmental timing in Arabidopsis. *Cell* **138**, 750-759 (2009).
- 731 47 Guo, C. *et al.* Repression of miR156 by miR159 Regulates the Timing of  
732 the Juvenile-to-Adult Transition in Arabidopsis. *Plant Cell* **29**, 1293-1304  
733 (2017).
- 734 48 Dallaire, A., Frederick, P. M. & Simard, M. J. Somatic and Germline  
735 MicroRNAs Form Distinct Silencing Complexes to Regulate Their Target  
736 mRNAs Differently. *Dev Cell* **47**, 239-247 e234 (2018).
- 737 49 Kieber, J. J., Rothenberg, M., Roman, G., Feldmann, K. A. & Ecker, J. R.  
738 CTR1, a negative regulator of the ethylene response pathway in  
739 Arabidopsis, encodes a member of the raf family of protein kinases. *Cell*  
740 **72**, 427-441 (1993).
- 741 50 Mi, S. *et al.* Sorting of small RNAs into Arabidopsis argonaute complexes  
742 is directed by the 5' terminal nucleotide. *Cell* **133**, 116-127 (2008).
- 743 51 Calarco, J. P. *et al.* Reprogramming of DNA methylation in pollen guides  
744 epigenetic inheritance via small RNA. *Cell* **151**, 194-205 (2012).

- 745 52 Honys, D. & Twell, D. Transcriptome analysis of haploid male  
746 gametophyte development in Arabidopsis. *Genome Biol* **5**, R85 (2004).  
747 53 Anokye-Danso, F. *et al.* Highly efficient miRNA-mediated reprogramming  
748 of mouse and human somatic cells to pluripotency. *Cell Stem Cell* **8**, 376-  
749 388 (2011).  
750 54 Lin, S. L. *et al.* Regulation of somatic cell reprogramming through  
751 inducible mir-302 expression. *Nucleic Acids Res* **39**, 1054-1065 (2011).  
752 55 Miyoshi, N. *et al.* Reprogramming of mouse and human cells to  
753 pluripotency using mature microRNAs. *Cell Stem Cell* **8**, 633-638 (2011).  
754 56 Fabbri, M. *et al.* MicroRNA-29 family reverts aberrant methylation in lung  
755 cancer by targeting DNA methyltransferases 3A and 3B. *Proc Natl Acad*  
756 *Sci U S A* **104**, 15805-15810 (2007).  
757 57 Leonardo, T. R., Schultheisz, H. L., Loring, J. F. & Laurent, L. C. The  
758 functions of microRNAs in pluripotency and reprogramming. *Nat Cell Biol*  
759 **14**, 1114-1121 (2012).  
760 58 Pall, G. S. & Hamilton, A. J. Improved northern blot method for enhanced  
761 detection of small RNA. *Nat Protoc* **3**, 1077-1084 (2008).  
762 59 Rodriguez-Enriquez, M. J., Mehdi, S., Dickinson, H. G. & Grant-Downton,  
763 R. T. A novel method for efficient in vitro germination and tube growth of  
764 Arabidopsis thaliana pollen. *New Phytol* **197**, 668-679 (2013).  
765 60 Alexander, M. P. Differential staining of aborted and nonaborted pollen.  
766 *Stain Technol* **44**, 117-122 (1969).  
767 61 Stocks, M. B. *et al.* The UEA sRNA Workbench (version 4.4): a  
768 comprehensive suite of tools for analyzing miRNAs and sRNAs.  
769 *Bioinformatics* **34**, 3382-3384 (2018).  
770 62 Copenhaver, G. P. *et al.* Genetic definition and sequence analysis of  
771 Arabidopsis centromeres. *Science* **286**, 2468-2474 (1999).  
772  
773

## 774 Acknowledgements

775  
776 The authors thank Professor Feng Qu for the *P19* clone and Professor Michael  
777 Lenhard for his gift of the cellulosic membranes used for pollen grain  
778 germination. Sequencing was performed by the SNP&SEQ Technology Platform  
779 in Uppsala. The facility is part of the National Genomics Infrastructure (NGI)  
780 Sweden and Science for Life Laboratory. The SNP&SEQ Platform is also  
781 supported by the Swedish Research Council and the Knut and Alice Wallenberg  
782 Foundation.

## 784 Author information

## 786 Funding

787 Research in the G.M. group is supported by SLU, the Carl Tryggers Foundation  
788 and the Swedish Research Council (VR 2016-05410).

## 790 Data access:

791 Data can be accessed at the GEO accession number with the  
792 reviewer token:

793

794 **Supplementary information:**

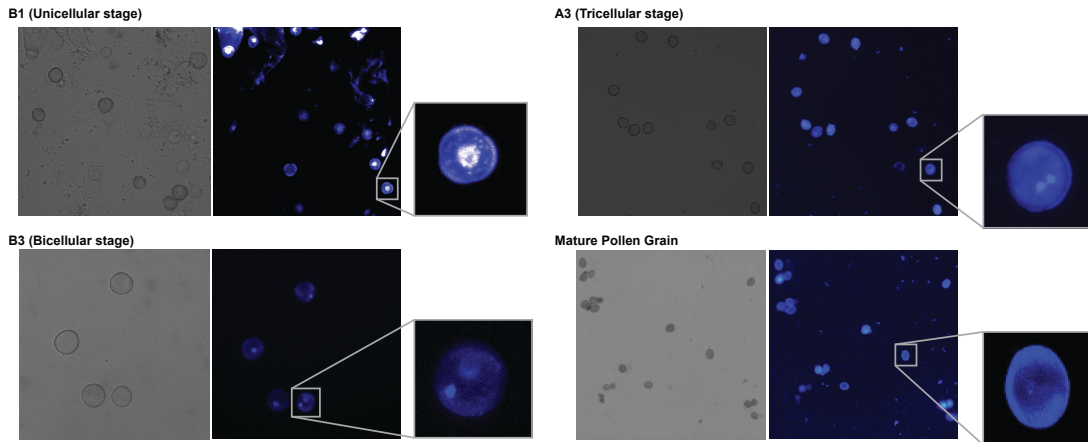

795

796

797 **Supplementary Figure 1.** Representative pictures for each of the fractions of  
798 pollen developmental stages analyzed by sRNA high-throughput sequencing: B1  
(Unicellular), B3 (Bicellular), A3 (Tricellular) and mature pollen grains.

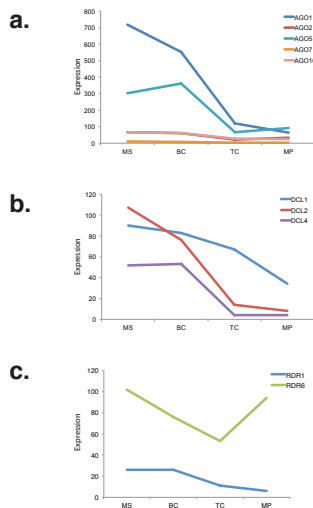

799

800

801 **Supplementary Figure 2.** Expression pattern of different RNA silencing  
802 components involved in miRNA-related pathways during pollen development: a)  
803 AGO, b) DCL and c) RDR genes. Data extracted from ATH1 microarray. MS=  
804 microspore, BC=bicellular pollen, TC= tricellular pollen and MP= mature pollen  
grain.

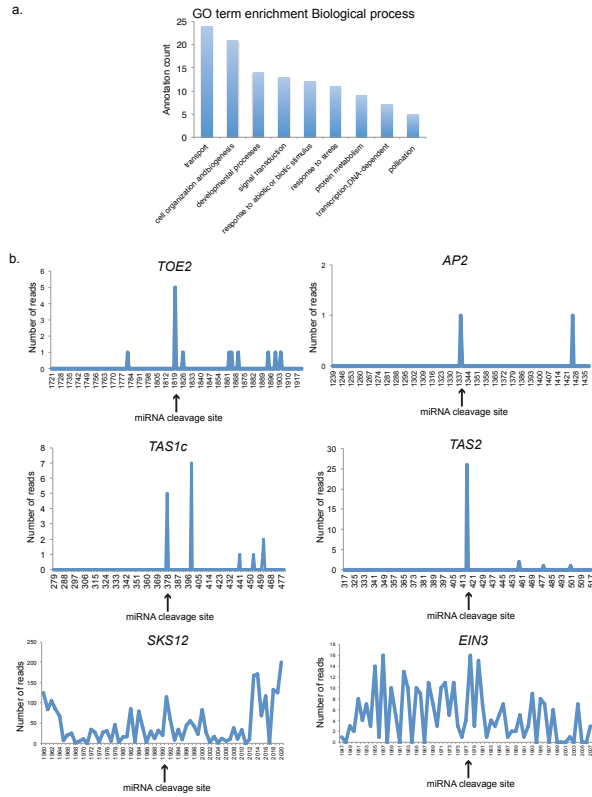

805  
 806 **Supplementary Figure 3.** a) Analysis of the enriched GO categories for pollen  
 807 specific miRNA-targeted genes. b) PARE read distribution along miRNA target  
 808 sites for representative miRNA-targeted genes in Arabidopsis: miR172-targeted  
 809 genes *TOE2* and *AP2* and miR173-targeted *TAS1c* and *TAS2* and the miRNA-  
 810 targeted genes analyzed here: *SKS12* and *EIN3*.

AT1G55570.1 (*SKS12*)

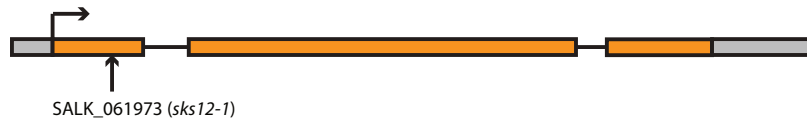

811  
 812 **Supplementary Figure 4.** Diagram showing the location of the T-DNA insertion  
 813 for the *sks12-1* mutant analyzed in this study (SALK\_061973).



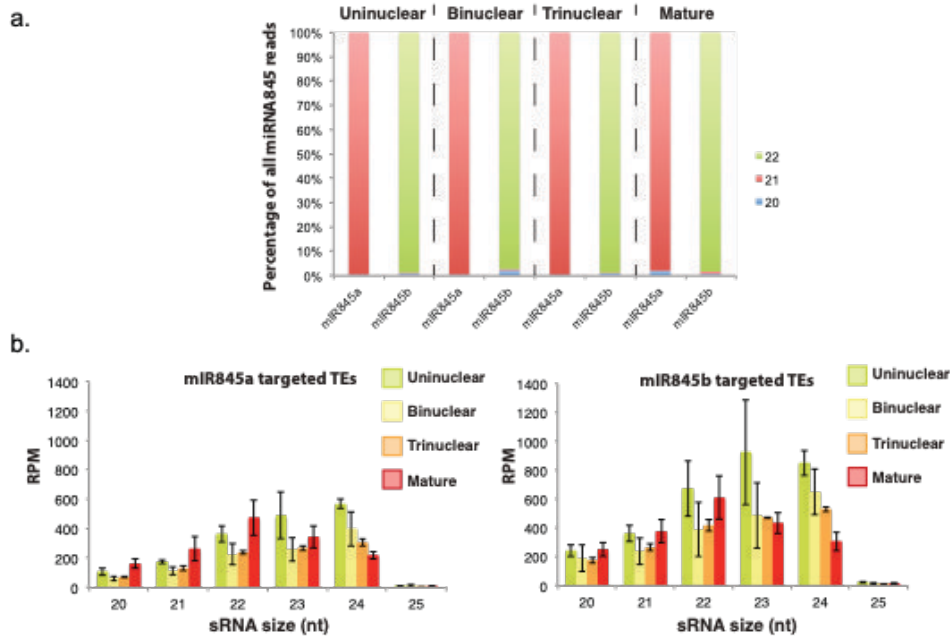

814  
815  
816  
817  
818

**Supplementary Figure 5.** Analysis of miR845 family members and target TEs during pollen development. a) Preferential sRNA size for miR845a and b during pollen development. b) Accumulation profile of miR845a- and miR845b-targeted TEs.

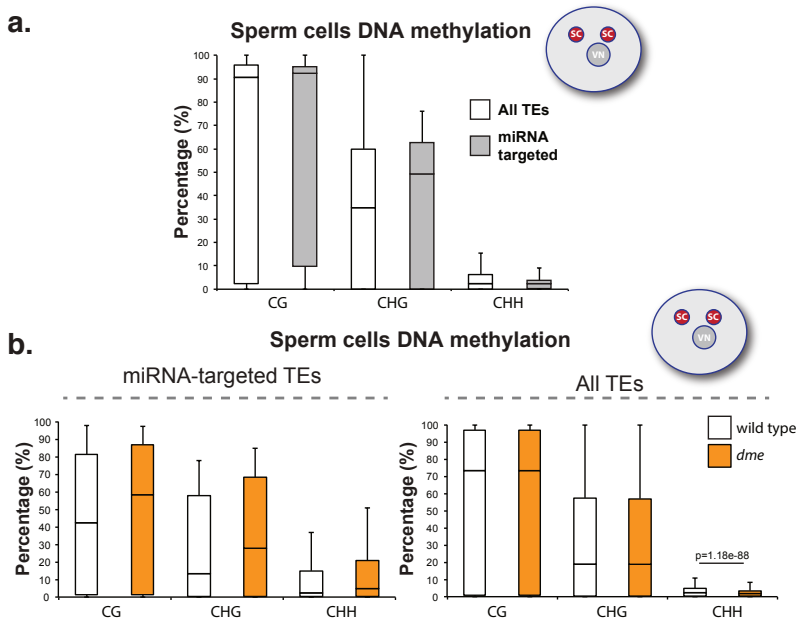

819  
820  
821  
822  
823  
824  
825

**Supplementary Figure 6.** a) Levels of cytosine methylation for the different contexts (CG, CHG and CHH) in the SCs for all TEs (white boxes) or miRNA-targeted TEs (grey boxes). b) Levels of cytosine methylation for the different contexts (CG, CHG and CHH) in the SCs for miRNA-targeted TEs (left panel) or all TEs (right panel) in wild type (white boxes) and *dme* (orange boxes). Whiskers in the box plots extent to the maximum and minimum values.

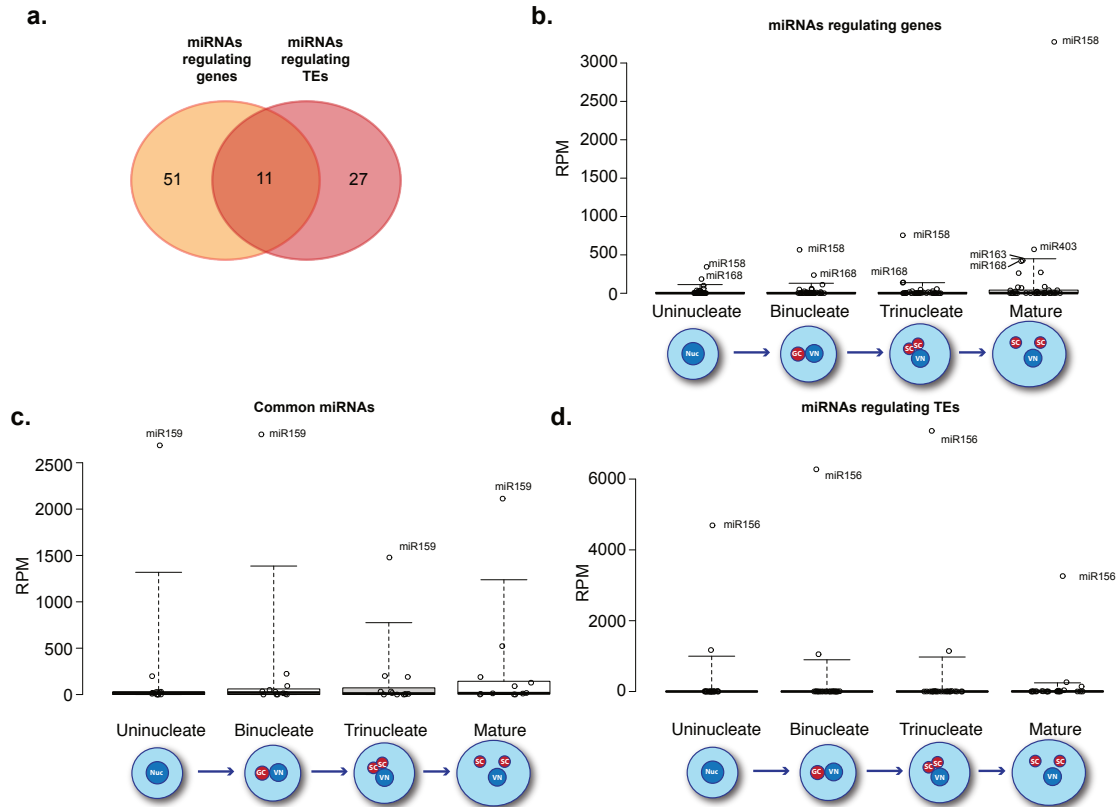

826  
827  
828  
829  
830  
831

**Supplementary Figure 7.** a) Venn diagram depicting the overlap between the number of PARE-identified miRNAs regulating genes and TEs. b-d) Box plots showing the accumulation values in reads per million (RPM) of PARE-identified miRNAs regulating genes (b), TEs (d) or both (c). Whiskers in the box plots extent to the 5<sup>th</sup> and 95<sup>th</sup> percentile.

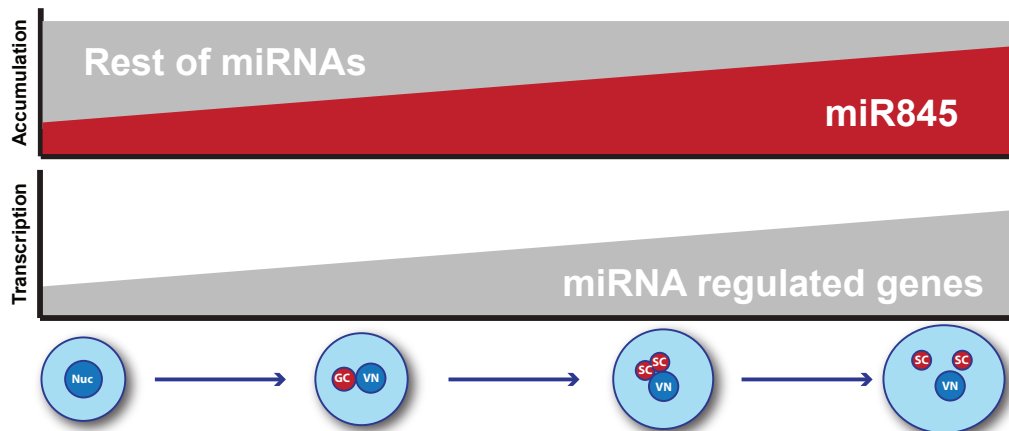

832  
833  
834  
835  
836

**Supplementary Figure 8.** Graphic conclusion. During pollen grain development the miRNome is reprogrammed to overload miR845 members at maturity.

**Supplementary Table 1.** Libraries produced in this study.

837

838 **Supplementary Table 2.** Common and tissue specific miRNAs identified in this  
839 study.

840

841 **Supplementary Table 3.** Pollen miRNA-targeted genes identified by PARE  
842 sequencing.

843

844 **Supplementary Table 4.** Pollen miRNA-targeted TEs identified by PARE  
845 sequencing.

846

847 **Supplementary Table 5.** Publicly available data analyzed in this study.

848

849 **Supplementary Table 6.** Primers used in this study.

850
